# Supplementary material
Source: Springer Nature journal article supplement (https://www.springermedizin.de/resource/supplementary/12913_2009_1262_MOESM1_ESM.pdf/9527722)
Supplement: MOESM1 [file 9527722]

| Setting up or enhancing multidisciplinary clinics | Delineating integrated care pathways and referrals                        | Providing education for:                    |                                                                           |
|---------------------------------------------------|---------------------------------------------------------------------------|---------------------------------------------|---------------------------------------------------------------------------|
|                                                   |                                                                           | Healthcare professionals                    | Service users or community                                                |
| <b>Groups of disorders:</b>                       |                                                                           |                                             |                                                                           |
| Adult chronic disease                             | Adult chronic disease                                                     | Adult chronic disease                       |                                                                           |
| Cardiology                                        | Cardiology                                                                | Cardiology                                  |                                                                           |
| Endocrinology                                     | Endocrinology                                                             | Endocrinology                               |                                                                           |
|                                                   | Eye disease                                                               | Eye disease                                 |                                                                           |
| Nephrology                                        | Nephrology                                                                | Nephrology                                  |                                                                           |
|                                                   | Neurology                                                                 | Neurology                                   |                                                                           |
|                                                   | Adult sudden death                                                        |                                             |                                                                           |
| <b>Individual disorders:</b>                      |                                                                           |                                             |                                                                           |
|                                                   | Achondroplasia                                                            |                                             |                                                                           |
|                                                   | Haemochromatosis                                                          | Haemochromatosis                            |                                                                           |
|                                                   | Maturity Onset Diabetes of the Young (MODY)                               | Maturity Onset Diabetes of the Young (MODY) |                                                                           |
|                                                   | Neurofibromatosis                                                         |                                             |                                                                           |
|                                                   | Tuberous sclerosis                                                        |                                             |                                                                           |
|                                                   | Family screening for autosomal recessive disorders in the Asian Community |                                             | Family screening for autosomal recessive disorders in the Asian Community |
|                                                   |                                                                           |                                             | Raising awareness in the South Asian Community                            |
|                                                   |                                                                           | Courses covering a wide range of disorders  |                                                                           |
